# Supplementary material for: Genetic subtraction profiling identifies genes essential for Arabidopsisreproduction and reveals interaction between the female gametophyte and the maternal sporophyte
Source: Springer Nature journal article supplement (doi:10.1186/gb-2007-8-10-r204), 2007-10-03
Supplement: Additional file 1 [file gb-2007-8-10-r204-s1.pdf]

## Additional data file 1. Validation for embryo sac expression

| TAIR ID                           | Gene Description                            | FC <sup>a</sup> | Embryo Sac Expression (Method) <sup>b</sup> | Reference        |
|-----------------------------------|---------------------------------------------|-----------------|---------------------------------------------|------------------|
| <i>(i) coaliquie</i> Dataset      |                                             |                 |                                             |                  |
| At4g37450                         | AGP18                                       | 1.50            | egg, synergids, antipodals (ET, ISH)        | [87]             |
| At1g80370                         | Cyclin A2;4, Endocycle Regulation           | 1.28            | embryo sac (PRG)                            | This study       |
| At4g01970                         | Galactosyltransferase                       | 1.51            | embryo sac (ET)                             | This study       |
| At5g40260                         | Nodulin MtN3 Protein                        | 1.99            | embryo sac (ISH, PRG)                       | This study; [34] |
| At4g30590                         | Plastocyanin                                | 1.83            | embryo sac (ISH, PRG)                       | This study; [34] |
| At4g34110                         | Polyadenylate-Binding Protein 2 (PAB2)      | 1.30            | embryo sac (PRG)                            | [88]             |
| At1g71770                         | Polyadenylate-Binding Protein 5 (PAB5)      | 1.38            | embryo sac (PRG)                            | [89]             |
| At1g78940                         | Protein Kinase, Cell Cycle Progression      | 1.35            | embryo sac (ISH)                            | This study       |
| At1g28220                         | Purine Permease 3 (PUP3)                    | 1.30            | synergids (PRG)                             | This study       |
| At5g60270                         | Receptor Kinase                             | 1.56            | egg cell (ISH)                              | This study       |
| At1g58470                         | RNA Binding Protein, RPB1                   | 1.34            | embryo sac (PRG)                            | [90]             |
| At1g24260                         | SEPALLATA 3 (SEP3)                          | 1.34            | embryo sac (ISH)                            | [91]             |
| At3g61160                         | Shaggy-Like Kinase $\beta$ (ASK $\beta$ )   | 1.32            | central cell (ISH)                          | [27]             |
| At5g50915                         | TCP Transcription Factor                    | 1.36            | egg, central cell (ISH)                     | This study       |
| At3g61740                         | Trithorax Like Protein (ATX3)               | 1.47            | central cell, egg, synergids (ISH)          | This study       |
| <i>(ii) sporocyteless</i> Dataset |                                             |                 |                                             |                  |
| At1g02580                         | E(Z) Homologue, MEDEA                       | 1.64            | egg, central cell (PRG, ISH)                | [85]             |
| At2g35670                         | Fertilization Independent Seed 2 (FIS2)     | 4.31            | central cell (PRG)                          | [25]             |
| At4g02060                         | MADS Box Protein, PROLIFERA                 | 1.34            | embryo sac (ET, ISH)                        | [15]             |
| At4g18770                         | R2R3-MYB Transcription Factor (MYB98)       | 14.23           | synergids (PRG, PrGFP)                      | [22]             |
| At4g25530                         | Homeodomain Protein, FWA                    | 5.04            | central cell (PrGFP)                        | [92]             |
| At2g37560                         | Origin recognition complex subunit 2 (ORC2) | 1.28            | egg, synergid, central cell (ISH)           | [93]             |
| At5g40260                         | Nodulin MtN3 Protein                        | 14.22           | embryo sac (ISH, PRG)                       | This study; [34] |
| At4g30590                         | Plastocyanin                                | 1.83            | embryo sac (ISH, PRG)                       | This study; [34] |
| At1g71770                         | Polyadenylate-binding protein 5 (PAB5)      | 1.38            | embryo sac (PRG)                            | [89]             |
| At1g26795                         | Self-Incompatibility Protein-Related        | 25.98           | embryo sac (PRG)                            | [34]             |
| At1g36340                         | E2, Ubiquitin-Conjugating Enzyme            | 14.97           | antipodals (PRG)                            | [34]             |
| At3g24220                         | 9-Cis-Epoxycarotenoid Dioxygenase (NCED6)   | 2.24            | central cell (PrGFP)                        | [94]             |

<sup>a</sup>Genes that exhibited a greater than 1.28-fold change (FC) in their wild-type signal values from the corresponding values from mutants that lacked an embryo sac ( $P < 0.1$ )

<sup>b</sup>Gene expression was identified by enhancer-traps (ET), gene promoter elements fused with marker genes such as  $\beta$ -glucuronidase (PRG) or GFP (PrGFP), and *in situ* hybridization (ISH)
