# Supplementary material for: Genetic subtraction profiling identifies genes essential for Arabidopsisreproduction and reveals interaction between the female gametophyte and the maternal sporophyte
Source: Springer Nature journal article supplement (doi:10.1186/gb-2007-8-10-r204), 2007-10-03
Supplement: Additional file 7 [file gb-2007-8-10-r204-s7.pdf]

**Additional data file 7.** Different statistical treatments are necessary to identify embryo sac – expressed and/or essential genes

| Probe ID                        | Gene ID   | Analysis | FC   | Probe ID                            | Gene ID   | Analysis | FC    |
|---------------------------------|-----------|----------|------|-------------------------------------|-----------|----------|-------|
| <b><i>coatlique</i> dataset</b> |           |          |      | <b><i>sporocyteless</i> dataset</b> |           |          |       |
| 251276_at                       | At3g61740 | G        | 1.47 | 265801_at                           | At2g35670 | dC       | 4.31  |
| 253050_at                       | At4g37450 | G        | 1.50 | 260908_at                           | At1g02580 | dC       | 1.64  |
| 251358_at                       | At3g61160 | G        | 1.32 | 267414_at                           | At2g34790 | dC       | 2.29  |
| 264139_at                       | At1g78940 | G        | 1.35 | 245239_at                           | At4g25530 | dC, R    | 2.41  |
| 253280_at                       | At4g34110 | G        | 1.30 | 254619_at                           | At4g18770 | dC, R    | 3.73  |
| 261511_at                       | At1g71770 | G        | 1.38 | 249013_at                           | At5g44700 | dC, R    | 2.53  |
| 245808_at                       | At1g58470 | G        | 1.31 | 260124_at                           | At1g36340 | dC, R    | 14.87 |
| 262859_at                       | At1g64790 | G        | 1.30 | 257242_at                           | At3g24220 | dC, R    | 2.24  |
| 251311_at                       | At3g61140 | G        | 1.35 | 249401_at                           | At5g40260 | dC, R    | 14.42 |
| 255550_at                       | At4g01970 | G        | 1.51 | 253634_at                           | At4g30590 | dC, R    | 12.21 |
| 245356_at                       | At4g13940 | G        | 1.29 | 256719_at                           | At2g34130 | dC, R    | 9.92  |
| 245661_at                       | At1g28220 | G        | 1.30 | 261271_at                           | At1g26795 | dC, R    | 25.98 |
| 266465_at                       | At2g47750 | G        | 1.29 | 253656_at                           | At4g30090 | dC, R    | 2.12  |
| 260282_at                       | At1g80410 | G        | 1.29 | 250320_at                           | At5g12840 | G        | 1.34  |
| 264087_at                       | At2g31340 | G        | 1.28 | 260417_at                           | At1g69770 | G        | 1.40  |
| 260417_at                       | At1g69770 | G        | 1.29 | 264748_at                           | At1g70070 | G        | 1.28  |
| 249401_at                       | At5g40260 | G, dC, R | 1.99 | 255513_at                           | At4g02060 | G        | 1.34  |
| 253634_at                       | At4g30590 | G, dC, R | 1.83 | 260291_at                           | At1g63700 | G        | 1.59  |
| 264872_at                       | At1g24260 | G, R     | 1.34 | 267173_at                           | At2g37560 | G        | 1.28  |
| 248460_at                       | At5g50915 | G, R     | 1.36 | 250893_at                           | At5g03800 | G        | 1.41  |
| 247617_at                       | At5g60270 | G, R     | 1.56 | 263899_at                           | At2g21710 | G        | 1.58  |
| 260329_at                       | At1g80370 | G, R     | 1.28 | 258149_at                           | At3g18110 | G        | 1.28  |
| 250273_at                       | At5g13010 | R        | 1.36 | 261511_at                           | At1g71770 | G        | 1.33  |
| 255799_at                       | At4g10180 | R        | 1.31 | 253011_at                           | At4g37890 | G        | 1.53  |
|                                 |           |          |      | 252927_at                           | At4g39090 | G        | 1.30  |
|                                 |           |          |      | 265074_at                           | At1g55540 | G        | 1.28  |
|                                 |           |          |      | 251179_at                           | At3g63460 | G        | 1.40  |
|                                 |           |          |      | 258918_at                           | At3g10560 | G, dC    | 1.89  |
|                                 |           |          |      | 249851_at                           | At5g23260 | G, dC, R | 1.69  |
|                                 |           |          |      | 248240_at                           | At5g53950 | G, dC, R | 2.74  |
|                                 |           |          |      | 257130_at                           | At3g20210 | G, dC, R | 1.49  |
|                                 |           |          |      | 265954_at                           | At2g37260 | G, R     | 1.79  |

G=GeneSpring; dC=dCHIP; R=gcRMA. FC=Fold Change

Note: Refer to Additional data files 1 and 4 for description of genes
