# Supplementary material for: Genetic subtraction profiling identifies genes essential for Arabidopsisreproduction and reveals interaction between the female gametophyte and the maternal sporophyte
Source: Springer Nature journal article supplement (doi:10.1186/gb-2007-8-10-r204), 2007-10-03
Supplement: Additional file 8 [file gb-2007-8-10-r204-s8.pdf]

**Additional data file 8.** List of maize and wheat ESTs from the embryo sac cell types, which were used in BLAST analysis of *Arabidopsis* proteins

| EST-Tissue Source               | Number of ESTs | Number of Represented Genes <sup>c</sup> | GenBank ID <sup>a</sup>                                                                               | Reference            |
|---------------------------------|----------------|------------------------------------------|-------------------------------------------------------------------------------------------------------|----------------------|
| Embryo sac                      | 10,747         | 6,032 (4,869)                            | Several NCBI IDs (M)                                                                                  | [59]                 |
| Egg cell                        | 5,925          | 3,761 (3,233)                            | Several NCBI IDs (M)<br>DN591121 - DN591151 (M)<br>AL830671 - AL831324 (W)<br>CV973579 - CV973658 (W) | [59]<br>[54]<br>[58] |
| Central cell and endosperm 6DAP | 15,677         | 5,853 (4,321)                            | DN591090-DN591120 (M)<br>Several NCBI IDs <sup>b</sup> (M)                                            | [59]<br>[104]        |

<sup>a</sup>M = maize; W = wheat

<sup>b</sup>EST data were included based on the 6DAP library names (Endosperm\_2, Endosperm\_4, Endosperm\_5, Endosperm\_6: refer to [104] for details)

<sup>c</sup>The sequences of each EST data set were clustered using blastclust (NCBI) to get estimates of the number of independent clusters (=represented genes). Number of singletons is given in brackets
