# Supplementary material for: Genetic subtraction profiling identifies genes essential for Arabidopsisreproduction and reveals interaction between the female gametophyte and the maternal sporophyte
Source: Springer Nature journal article supplement (doi:10.1186/gb-2007-8-10-r204), 2007-10-03
Supplement: Additional file 11 [file gb-2007-8-10-r204-s11.pdf]

**Additional data file 11.** Primers used for mutant genotyping, probes for mRNA *in situ* hybridization and RT-PCR

| Gene/Mutant        | Purpose <sup>1</sup> | Primers                                                                                                                     | T <sub>m</sub> <sup>2</sup> | Comments                                                                   |
|--------------------|----------------------|-----------------------------------------------------------------------------------------------------------------------------|-----------------------------|----------------------------------------------------------------------------|
| <i>At1G78940</i>   | ISH (ES)             | GCA GGA AAT CAA GGA AAG TC + CCG TTA TGG GCC TAA CA                                                                         | 52                          |                                                                            |
| <i>At5g40260</i>   | ISH (ES)             | TGG TGT TGG GTT AGT TAT CGA + TTC TCC TAA ACC CTC TCC GTA                                                                   | 58                          |                                                                            |
| <i>At4g30590</i>   | ISH (ES)             | CCT TGT CTT CCT CTT GTT TGC + CCA AAC CAA CCA CGA CTG C                                                                     | 54                          |                                                                            |
| <i>At3G61740</i>   | ISH (ES)             | CTG CAG CAA GAT GCC GTA + GCC GTT CTC TGA ATG ATG                                                                           | 52                          |                                                                            |
| <i>At5g50915</i>   | ISH (ES)             | CTA CAC CTC ACT CCT CCA + GTG TTG GTG ATG GCT GAT GGT C                                                                     | 55                          |                                                                            |
| <i>At5G60270</i>   | ISH (ES)             | CAG CAC CAC TCG TGA TCC + CGT TCT ACA AGC TAA GCT                                                                           | 52                          |                                                                            |
| <i>At3G12110</i>   | ISH (SP)             | AAC TTT CAA CAC TCC TGC CAT G + CTG CAA GGT CCA AAC GCA GA                                                                  | 60                          |                                                                            |
| <i>At4G12410</i>   | RT, ISH (SP)         | AAC ACA GAG AGA GAT AC + GCT AAT GAC CGG ATT CC                                                                             | 50                          |                                                                            |
| <i>At1G75580</i>   | RT, ISH (SP)         | GTG TAC CCT GTG AGA GAC TTT + AAA GTC TCT CAC AGG GTA CAC                                                                   | 56                          |                                                                            |
| <i>At5G03200</i>   | RT, ISH (SP)         | GAG GCA ACT CCA GCG GAA G + TGC GCA CCC GCT ACA CAT AC                                                                      | 60                          |                                                                            |
| <i>At5G15980</i>   | RT, ISH (SP)         | CCA ACG AAT CTG CTG TAG + CAG ATG ATA AGC AAG TGG                                                                           | 50                          |                                                                            |
| <i>STM</i>         | RT, ISH (SP)         | CAA CGT GTC GAG TGT CAA TTC + GTC CAG CCC CGT TGA TTC                                                                       | 55                          |                                                                            |
| <i>At5G45420</i>   | RT                   | CAC GAT GAG TCA TCC ACG + GCC ACC GTC TCC CAT CTC                                                                           | 52                          |                                                                            |
| <i>At3G16770</i>   | RT                   | GAT GAT GTC ATT GCG TCG + CTA CAC ATT ACA CAA CAG AC                                                                        | 52                          |                                                                            |
| <i>At3G55660</i>   | RT                   | ATG GAG GAT AAT AGC TGT ATC GGG + CCA ATT ATC TCC GGG GTT GA                                                                | 55                          |                                                                            |
| <i>At4G15800</i>   | RT                   | ACT CTC CAC AAA ACC CGT TG + GTC GTG AGC AAG GAA CTG TG                                                                     | 55                          |                                                                            |
| <i>At1G25330</i>   | RT                   | GTA GTG TCT CTA ATG GCA CG + TCT CTT CGA CCC ACT CTC                                                                        | 50                          |                                                                            |
| <i>SUP</i>         | RT                   | CTC TAA GAG ACA GAC AGA CAT AG + GGC CAT GAA AAC CCT AGA AGA T                                                              | 52                          |                                                                            |
| <i>kerridwin-1</i> | genotyping           | SM32: TAC GAA TAA GAG CGT CCA TTT TAG AGT GA<br>B8-F: GGC TGA AAC ATC AAC TCC TTG TG<br>B8-R: GCA CAT GTT AGG CAA GAG AGT G | 55                          | SM32 + B8-R = 400 bp                                                       |
| <i>frigg-1</i>     | genotyping           | SK.LB: AGC TGT TGC CCG TCT CAC<br>S1F1: CCT GGC ATG TTT GCT CTT CG<br>S1R1: TGC AAG TGT GCT TCC GAG ATG                     | 55                          | B8-f + B8-R = 500 bp<br>S1F1 + S1R1 = 263 bp                               |
| <i>freya-1</i>     | genotyping           | VER-RB1: CAT CGG GAA TCG AAA GAT C<br>FEY-F: CAA GTC ATG TTG CTG TCG ATA A<br>FEY-R: CCG AAC AAA GGA TCA CCG C              | 58<br>47                    | S1F1 + SK.LB = 300 bp<br>VER-RB1 + FEY-R: 500 bp                           |
| <i>omisha-1</i>    | genotyping           | SYN-LB1: CAG TAC ATT AAA AAC GTC CGC AA<br>OMA-F: GGT ATC TCT CTT GTC AAA GGT TG<br>OMA-R: GCA CTG ATA TGC CTT ATC TCA      | 52<br>52                    | FEY-F + FEY-R = 268 bp<br>SYN-LB1 + OMA-F = 400 bp                         |
| <i>ilithyia-1</i>  | genotyping           | SK.LB: AGC TGT TGC CCG TCT CAC<br>ILA-F: GTG CAG GCT GAT CCC AAC<br>ILA-R: CTC TTC ATC AGA TGC CTA CAT G                    | 52<br>55<br>52              | FEY-F + FEY-R = 445 bp<br>SK.LB + ILA-R = 280 bp<br>ILA-F + ILA-R = 242 bp |

<sup>1</sup>ISH = mRNA *in situ* hybridisation; ES = embryo sac dataset; SP = sporophyte dataset; RT = Reverse-transcriptase PCR (RT-PCR)

<sup>2</sup>T<sub>m</sub> = melting temperature (°C)
